# Supplementary material for: Associations of Prepregnancy Body Mass Index and Gestational Weight Gain with Intelligence in Offspring: A Systematic Review and Meta-analysis
Source: Research Square preprint supplement (doi:10.21203/rs.3.rs-122777/v1), 2020-12-14
Supplement: Supplementary file 1 [file 28b910fcd139dd082ed57297.docx]

**Associations** **of prepregnancy body mass index and gestational weight gain with intelligence in offspring: A systematic review and meta-analysis**

Simeng Zhu1, 3, Yichen He1, 3, Chen Zhang2, Yanting Wu2, Hefeng Huang1,2

1International Peace Maternal and Child Health Hospital, Shanghai Jiao Tong University, School of medicine, China;

2Hospital of Obstetrics and Gynaecology, Fudan University, Shanghai 200011, China.

3These two authors contribute equally to this work.

**Corresponding Author**: Hefeng Huang, MD, International Peace Maternal and Child Health Hospital, Shanghai Jiao Tong University, School of medicine, Shanghai 2000030, China and Hospital of Obstetrics and Gynaecology, Fudan University, Shanghai 200011, China. ([huanghefg@hotmail.com](mailto:huanghefg@hotmail.com))

and Yanting Wu, PhD, Hospital of Obstetrics and Gynaecology, Fudan University, Shanghai 200011, People's Republic of China. (yanting_wu@163.com)

Additional file 3. ﻿ Pooled association between maternal obesity and intelligence in offspring in different subgroups.

| ﻿Subgroups | NO. of study | *P* for heterogeneity test | WMD and 95%CI | *P* for hypothesis test | I2 (%) | *P* for Egger's test | *P* for Begg's test |
| --- | --- | --- | --- | --- | --- | --- | --- |
| Pre-pregnancy overweight | 7 | 0.377 | FIQ: -3.246 (-4.07, -2.42) | <0.00001 | 6.2 | 0.796 | 1.000 |
| 2 | 0.197 | PIQ: -2.40 (-3.45, -1.34) | <0.00001 | 39.8 |  |  |
| 4 | 0.295 | VIQ: -3.17 (-4.38, -2.56) | <0.00001 | 19 |  |  |
| Pre-pregnancy obesity | 7 | 0.838 | FIQ: -4.845 (-5.93, -3.76) | <0.00001 | 0.0 | 0.501 | 0.707 |
| 2 | 0.275 | PIQ: -5.28 (-7.22, -3.34) | <0.00001 | 16.2 |  |  |
| 4 | 0.205 | VIQ: | <0.00001 | 34.5 |  |  |
| Excessive gestational weight gain | 4 | 0.482 | -0.14 (-0.92,0.65) | 0.735 | 0.0 | 0.561 | 0.734 |
